# Supplementary material for: Classification and Secondary Metabolite-Biosynthetic Gene Clusters of Marine Streptomyces Strains Including a Lobophorin- and Divergolide-Producer
Source: MDPI journal article supplement (doi:10.3390/hydrobiology2010010), 2023-02-01
Supplement: s1 [file s1]

# Supporting Information

## Classification and secondary metabolite-biosynthetic gene clusters of marine *Streptomyces* strains including a lobophorin- and divergolide-producer

Hisayuki Komaki <sup>1,\*</sup>, Tomohiko Tamura <sup>1</sup> and Yasuhiro Igarashi <sup>2</sup>

<sup>1</sup> Biological Resource Center, National Institute of Technology and Evaluation (NBRC), Chiba 292-0818, Japan

<sup>2</sup> Biotechnology Research Center and Department of Biotechnology, Toyama Prefectural University, Toyama 939-0398, Japan

\* Correspondence: komaki-hisayuki@nite.go.jp

### Contents

|                                                                                                                       |       |              |
|-----------------------------------------------------------------------------------------------------------------------|-------|--------------|
| <b>Table S1.</b> Most similar known cluster searched by antiSMASH for the gene clusters in <i>S. olivaceus</i> N11-26 | ..... | page 2       |
| <b>Table S2.</b> Most similar known cluster searched by antiSMASH for the gene clusters in <i>S. olivaceus</i> DC10-5 | ..... | page 3       |
| <b>Table S3.</b> Closest biosynthetic enzymes to PKSs and/or NRPSs in the gene clusters of <i>S. olivaceus</i> N11-26 | ..... | pages 4 to 6 |
| <b>Table S4.</b> Closest biosynthetic enzymes to PKSs and/or NRPSs in the gene clusters of <i>S. olivaceus</i> DC10-5 | ..... | pages 7 to 9 |

**Table S1.** Most similar known cluster searched by antiSMASH for the gene clusters in *S. olivaceus* N11-26.

| Gene cluster                                                  | Most similar known cluster                  |                                       | Similarity |
|---------------------------------------------------------------|---------------------------------------------|---------------------------------------|------------|
| <i>t1pks-1</i>                                                | SF2487                                      | Polyketide                            | 17 %       |
| <i>nrps-1</i>                                                 | coelichelin                                 | NRP*                                  | 100 %      |
| <i>t1pks-2</i> <sup>a</sup><br><i>nrps-3</i> <sup>a</sup>     | divergolides A, B, C & D                    | Polyketide: Modular type I polyketide | 100 %      |
| <i>nrps-4</i> <sup>b</sup>                                    | hopene                                      | Terpene                               | 92 %       |
| <i>nrps-5</i>                                                 | nogalamycin                                 | Polyketide                            | 40 %       |
| <i>nrps-6</i>                                                 | diisonitrile antibiotic SF2768              | NRP                                   | 55 %       |
| <i>pks/nrps-1</i>                                             | xiamycin A                                  | Terpene <sup>c</sup>                  | 72 %       |
| <i>nrps-7</i>                                                 | telomycin                                   | NRP                                   | 29 %       |
| <i>pks/nrps-2</i>                                             | auroramycin                                 | Polyketide <sup>d</sup>               | 8 %        |
| <i>t2pks-2</i>                                                | spore pigment                               | Polyketide                            | 85 %       |
| <i>t1pks-4</i>                                                | butyrolactol A                              | Polyketide                            | 86 %       |
| <i>pks/nrps-3</i>                                             | detoxins P1, P2 & P3                        | NRP+Polyketide                        | 75 %       |
| <i>t3pks-1</i>                                                | flaviolin & 1,3,6,8-tetrahydroxynaphthalene | Polyketide                            | 100 %      |
| <i>t3pks-2</i>                                                | germicidin                                  | Other <sup>e</sup>                    | 100 %      |
| <i>pks/nrps-4</i> <sup>f</sup><br><i>t1pks-5</i> <sup>f</sup> | lobophorin A                                | Polyketide                            | 96 %       |

\* NRP, nonribosomal peptide

a. Although two gene clusters are encoded, they were considered as a hybrid PKS/NRPS gene cluster. Consequently, the presence of mirubactin-biosynthetic gene cluster will not be noticed.

b. As hopene-biosynthetic gene cluster is encoded near *nrps-4*, hopene/Terpen was indicated as the Most similar known cluster although an NRPS gene cluster is present.

c. Although *pks/nrps-1* is a hybrid PKS/NRPS gene cluster, the biosynthetic gene cluster of xiamycin A, which is a terpene compound, was shown with a high similarity.

d. Even though *pks/nrps-2* is a hybrid PKS/NRPS gene cluster, the biosynthetic gene cluster of auroramycin, which is not a hybrid polyketide/nonribosomal peptide but a polyketide compound, was searched.

e. Germicidin is not 'Other' but 'Polyketide'.

f. Two independent gene cluster are at least encoded in this region although they are considered as a hybrid gene cluster by antiSMASH.

**Table S2.** Most similar known cluster searched by antiSMASH for the gene clusters in *S. olivaceus* DC10-5.

| Gene cluster                                                  | Most similar known cluster     |                               | Similarity |
|---------------------------------------------------------------|--------------------------------|-------------------------------|------------|
| <i>t1pks-1</i>                                                | linfuranones B & C             | Polyketide                    | 46 %       |
| <i>nrps-1</i>                                                 | coelichelin                    | NRP                           | 100 %      |
| <i>nrps-2</i>                                                 | cyclomarin D                   | NRP                           | 8 %        |
| <i>t1pks-2</i> <sup>a</sup><br><i>nrps-3</i> <sup>a</sup>     | divergolides A, B, C & D       | Polyketide: Modular type I    | 96 %       |
| <i>nrps-4</i> <sup>b</sup>                                    | hopene                         | Terpene                       | 92 %       |
| <i>nrps-5</i>                                                 | nogalamycin                    | Polyketide                    | 40 %       |
| <i>nrps-6</i>                                                 | diisonitrile antibiotic SF2768 | NRP                           | 55 %       |
| <i>t1pks-3</i>                                                | arsono-polyketide              | Polyketide                    | 100%       |
| <i>pks/nrps-1</i>                                             | xiamycin A                     | Terpene <sup>c</sup>          | 72 %       |
| <i>t2pks-1</i> <sup>g</sup><br><i>nrps-7</i> <sup>g</sup>     | olimycins A & B                | Polyketide                    | 100 %      |
| <i>t2pks-2</i>                                                | spore pigment                  | Polyketide                    | 85 %       |
| <i>nrps-8</i>                                                 | ishigamide                     | NRP + Polyketide <sup>h</sup> | 27 %       |
| <i>pks/nrps-3</i>                                             | rimosamide                     | NRP                           | 21 %       |
| <i>t3pks-1</i>                                                | herboxidiene                   | Polyketide                    | 8 %        |
| <i>t3pks-2</i>                                                | germicidin                     | Other <sup>e</sup>            | 100 %      |
| <i>pks/nrps-4</i> <sup>f</sup><br><i>t1pks-5</i> <sup>f</sup> | lobophorin A                   | Polyketide                    | 91 %       |

Footnotes are the same in Table S1.

g. Although this region was considered as a hybrid PKS/NRPS gene cluster by antiSMASH, two independent gene cluster are present.

h. Although ishigamide- biosynthetic gene cluster encodes NRPSs and PKSs, *nrps-8* does not encode any PKSs.

**Table S3.** Closest biosynthetic enzymes to PKSs and/or NRPSs in the gene clusters of *S. olivaceus* N11-26.

| Gene cluster      | ORF encoding PKS or NRPS<br>(Domain organization) <sup>a</sup>                                                                           | Closest biosynthetic enzyme<br>(Domain organization) <sup>b</sup>                                             | Product <sup>c</sup>   | Similarity<br>(I/P, %) <sup>d</sup> |
|-------------------|------------------------------------------------------------------------------------------------------------------------------------------|---------------------------------------------------------------------------------------------------------------|------------------------|-------------------------------------|
| <i>t1pks-1</i>    | TPA0906_11330<br>(KS AT <sub>m</sub> ACP<br>KS AT <sub>m</sub> DH KR ACP<br>KS AT <sub>mm</sub> KR ACP)                                  | ORF 3 <sup>e</sup><br>(KS AT <sub>m</sub> ACP<br>KS AT <sub>mm</sub> DH KR ACP<br>KS AT <sub>mm</sub> KR ACP) | E-837                  | 47/57                               |
|                   | TPA0906_11340<br>(KS AT <sub>m</sub> ACP<br>KS AT <sub>mm</sub> DH KR ACP<br>KS AT <sub>m</sub> DH KR ACP<br>KS AT <sub>mm</sub> KR ACP) | ORF 4 <sup>f</sup><br>(KS AT <sub>m</sub> DH KR ACP<br>KS AT <sub>mm</sub> DH KR ACP)                         |                        | 47/58                               |
|                   | TPA0906_11310<br>(KS AT <sub>m</sub> DH ER KR ACP<br>KS AT <sub>mm</sub> DH KR ACP)                                                      | ORF 6 <sup>g</sup><br>(KS AT <sub>m</sub> DH KR ACP<br>KS AT <sub>mm</sub> KR ACP)                            |                        | 53/64                               |
|                   | TPA0906_11300<br>(KS AT <sub>m</sub> ACP TE)                                                                                             | ORF 7 <sup>h</sup><br>(KS AT <sub>mm</sub> KR ACP TE)                                                         |                        | 53/62                               |
| <i>nrps-1</i>     | TPA0906_09680<br>(A PCP E<br>C A <sub>thr</sub> PCP E<br>C A PCP)                                                                        | SCO0492<br>(A <sub>orn</sub> PCP E<br>C A <sub>thr</sub> PCP E<br>C A <sub>orn</sub> PCP)                     | coelichelin            | 82/87                               |
| <i>t1pks-2</i>    | TPA0906_04350<br>(CoL KR ACP<br>KS AT <sub>mm</sub> DH KR ACP<br>KS AT <sub>m</sub> ACP<br>KS AT <sub>m</sub> KR ACP)                    | DivK<br>(CoL KR ACP<br>KS AT <sub>mm</sub> DH KR ACP<br>KS AT <sub>m</sub> ACP<br>KS AT <sub>m</sub> KR ACP)  | divergolides<br>A to D | 99/99                               |
|                   | TPA0906_04360<br>(KS AT <sub>em</sub> DH ER KR ACP)                                                                                      | DivL1<br>(KS AT <sub>em</sub> DH ER KR ACP)                                                                   |                        | 99/99                               |
|                   | TPA0906_04370<br>(KS AT <sub>m</sub> DH KR ACP)                                                                                          | DivL2<br>(KS AT <sub>m</sub> DH KR ACP)                                                                       |                        | 99/99                               |
|                   | TPA0906_04380<br>(KS AT DH ER KR ACP)                                                                                                    | DivL3<br>(KS AT DH ER KR ACP)                                                                                 |                        | 98/98                               |
|                   | TPA0906_04390<br>(KS AT <sub>mm</sub> ACP<br>KS AT <sub>m</sub> DH KR ACP)                                                               | DivM<br>(KS AT <sub>mm</sub> ACP<br>KS AT <sub>m</sub> DH KR ACP)                                             |                        | 99/99                               |
| <i>nrps-3</i>     | TPA0906_04020<br>(C A PCP E C A PCP E C)                                                                                                 | Amir_2719<br>(C A PCP E C A PCP E C)                                                                          | mirubactin             | 60/68                               |
| <i>nrps-4</i>     | TPA0906_03310<br>(PCP C A PCP<br>C A <sub>cys</sub> PCP)                                                                                 | SCO7682<br>(PCP C A <sub>arg</sub> PCP<br>C A <sub>cys</sub> PCP)                                             | coelibactin            | 82/85                               |
|                   | TPA0906_03320<br>(C A <sub>cys</sub> MT PCP TE)                                                                                          | SCO7683<br>(C A <sub>cys</sub> MT PCP TE)                                                                     |                        | 87/91                               |
| <i>nrps-5</i>     | TPA0906_13190<br>(C A <sub>val</sub> PCP TE)                                                                                             | - <sup>i</sup>                                                                                                | -                      | -                                   |
| <i>nrps-6</i>     | TPA0906_14110<br>(A)                                                                                                                     | SfaB<br>(A)                                                                                                   | SF2768                 | 75/83                               |
|                   | TPA0906_14100<br>(PCP)                                                                                                                   | SfaC<br>(PCP)                                                                                                 |                        | 62/77                               |
|                   | TPA0906_14090<br>(C A PCP TD)                                                                                                            | SfaD<br>(C A PCP TD)                                                                                          |                        | 65/74                               |
| <i>pks/nrps-1</i> | TPA0906_17130<br>(KS AT DH KR ACP<br>C A <sub>orn</sub> PCP TE)                                                                          | PtmA<br>(KS AT DH KR ACP<br>C A <sub>orn</sub> PCP TE)                                                        | pactamides             | 98/98                               |
| <i>nrps-7</i>     | TPA0906_17860<br>(C A <sub>orn</sub> PCP<br>C A <sub>orn</sub> PCP)                                                                      | -                                                                                                             | -                      | -                                   |

|                   |                                                                                                                                              |                                                                                                                                          |                                    |         |
|-------------------|----------------------------------------------------------------------------------------------------------------------------------------------|------------------------------------------------------------------------------------------------------------------------------------------|------------------------------------|---------|
|                   | C A <sub>om</sub> PCP)                                                                                                                       |                                                                                                                                          |                                    |         |
| <i>pks/nrps-2</i> | TPA0906_18230<br>(PCP C A PCP)                                                                                                               | -                                                                                                                                        | -                                  | -       |
|                   | TPA0906_18220<br>(ACP KS AT <sub>m</sub> )                                                                                                   | -                                                                                                                                        |                                    | -       |
|                   | TPA0906_18200<br>(A <sub>pro</sub> PCP)                                                                                                      | -                                                                                                                                        |                                    | -       |
| <i>t2pks-2</i>    | TPA0906_23390<br>(KS $\alpha$ )                                                                                                              | AAG26879.1<br>(KS $\alpha$ )                                                                                                             | spore pigment                      | 78/84   |
|                   | TPA0906_23390<br>(KS $\beta$ )                                                                                                               | AAG26880.1<br>(KS $\beta$ )                                                                                                              |                                    | 75/83   |
|                   | TPA0906_23390<br>(ACP)                                                                                                                       | AAG26884.1<br>(ACP)                                                                                                                      |                                    | 55/69   |
| <i>t1pks-4</i>    | TPA0906_62330<br>(KS AT <sub>mm</sub> ACP<br>KS AT <sub>mm</sub> DH ER KR ACP)                                                               | APK71_RS29920<br>(AT <sub>mm</sub> ACP<br>KS AT <sub>mm</sub> DH ER KR ACP<br>KS AT <sub>m</sub> KR ACP<br>KS AT <sub>m</sub> DH KR ACP) | butyrolactol A                     | 50/58   |
|                   | TPA0906_62340<br>(KS AT <sub>mm</sub> DH KR ACP)                                                                                             | APK71_RS29940<br>(KS AT <sub>m</sub> DH KR ACP<br>KS AT <sub>m</sub> DH KR ACP)                                                          |                                    | 47/57   |
|                   | TPA0906_62350<br>(KS AT <sub>mm</sub> DH ER KR APC<br>KS KR ACP)                                                                             | APK71_RS29945<br>(KS AT DH ER KR ACP<br>KS KR ACP)                                                                                       |                                    | 57/66   |
|                   | TPA0906_62360<br>(KS AT <sub>m</sub> KR ACP<br>KS AT <sub>m</sub> KR ACP)                                                                    | APK71_RS29950<br>(KS AT <sub>m</sub> KR ACP<br>KS AT <sub>m</sub> KR ACP)                                                                |                                    | 65/74   |
|                   | TPA0906_62370<br>(KS DH KR ACP)                                                                                                              | APK71_RS29955<br>(KS DH KR ACP)                                                                                                          |                                    | 63/72   |
| <i>pks/nrps-3</i> | TPA0906_63450<br>(C A <sub>val</sub> PCP TE)                                                                                                 | RmoH <sup>j</sup><br>(C A <sub>val</sub> PCP TE)                                                                                         | rimosamide                         | 58/69   |
|                   | TPA0906_63440<br>(A PCP<br>C A <sub>pro</sub> PCP<br>KS KR ACP TE)                                                                           | RmoI <sup>k</sup><br>(A <sub>ile</sub> PCP<br>C A <sub>pro</sub> PCP<br>KS KR ACP TE)                                                    |                                    | 61/69   |
| <i>t3pks-1</i>    | TPA0906_64630<br>(KS)                                                                                                                        | SCO1206<br>(KS)                                                                                                                          | flaviolin <i>etc.</i> <sup>1</sup> | 90/95   |
| <i>t3pks-2</i>    | TPA0906_72820<br>(KS)                                                                                                                        | germicidins A and B synthase <sup>m</sup><br>(KS)                                                                                        | germicidins<br>A & B               | 100/100 |
| <i>pks/nrps-4</i> | TPA0906_73770<br>(KS AT <sub>m</sub> ACP<br>KS AT <sub>mm</sub> DH KR ACP<br>KS AT <sub>mm</sub> KR ACP<br>KS AT <sub>mm</sub> DH ER KR ACP) | TotA1<br>(KS AT <sub>m</sub> ACP<br>KS AT <sub>mm</sub> DH KR ACP<br>KS AT <sub>mm</sub> KR ACP<br>KS AT <sub>mm</sub> DH ER KR ACP)     | totopotensamides<br>A & B          | 98/98   |
|                   | TPA0906_73780<br>(KS AT <sub>mm</sub> DH ER KR ACP<br>KS AT <sub>m</sub> KR ACP)                                                             | TotA2<br>(KS AT <sub>mm</sub> DH ER KR ACP<br>KS AT <sub>m</sub> KR ACP)                                                                 |                                    | 98/98   |
|                   | TPA0906_73810<br>(C A <sub>thr</sub> PCP<br>C A <sub>ala</sub> PCP<br>C PCP<br>C A <sub>dhb</sub> PCP<br>C A PCP<br>C A PCP TE)              | TotA3<br>(C A <sub>thr</sub> PCP<br>C A <sub>ala</sub> PCP<br>C PCP<br>C A <sub>dhb</sub> PCP<br>C A PCP<br>C A PCP TE)                  |                                    | 98/98   |
| <i>t1pks-5</i>    | TPA0906_74290<br>(KS AT ACP)                                                                                                                 | LobS1<br>(KS AT ACP)                                                                                                                     | lobophorin A                       | 99/99   |

|                                 |                                 |       |
|---------------------------------|---------------------------------|-------|
| KS AT <sub>mm</sub> DH KR ACP   | KS AT <sub>mm</sub> DH KR ACP   |       |
| KS AT DH KR ACP                 | KS AT DH KR ACP                 |       |
| KS AT <sub>mm</sub> DH KR ACP)  | KS AT <sub>mm</sub> DH KR ACP)  |       |
| TPA0906_74280                   | LobS2                           | 97/97 |
| (KS AT <sub>m</sub> DH KR ACP   | (KS AT <sub>mm</sub> DH KR ACP  |       |
| KS AT <sub>mm</sub> DH KR ACP   | KS AT <sub>m</sub> DH KR ACP    |       |
| KS AT <sub>m</sub> DH KR ACP    | KS AT <sub>m</sub> DH KR ACP    |       |
| KS AT <sub>m</sub> DH KR ACP)   | KS AT <sub>m</sub> DH KR ACP)   |       |
| TPA0906_74270                   | LobS3                           | 87/89 |
| (KS AT <sub>mm</sub> DH KR ACP) | (KS AT <sub>mm</sub> DH KR ACP) |       |
| TPA0906_74260                   | LobS5                           | 97/97 |
| (KS AT <sub>m</sub> ACP)        | (KS AT <sub>m</sub> ACP)        |       |
| TPA0906_74140                   | LobS4                           | 96/96 |
| (KS AT DH ER KR ACP             | (KS AT DH ER KR ACP             |       |
| KS AT <sub>mm</sub> DH KR ACP)  | KS AT <sub>mm</sub> DH KR ACP)  |       |

Abbreviations of domains are as follows: A, adenylation; A<sub>xxx</sub>, adenylation domain incorporating the amino acid shown in subscript three code letter; ACP, acyl carrier protein; AT, acyltransferase; AT<sub>em</sub>, AT incorporating ethylmalonyl-CoA; AT<sub>m</sub>, AT incorporating malonyl-CoA; AT<sub>mm</sub>, AT incorporating methylmalonyl-CoA; C, condensation; CoL, CoA ligase; DH, dehydratase; E, epimerase; ER, enoyl reductase; KS, ketoacylsynthase; KR, ketoreductase; MT, methyltransferase; PCP, peptidyl carrier protein; TD, termination; TE, thioesterase.

- ORFs are indicated by locus tags. Domain organizations were predicted by antiSMASH.
- Not orphan but biosynthetic enzyme whose products were elucidated are shown by the name, locus tag or accession number. Domain organizations predicted by antiSMASH are indicated.
- product of the closest biosynthetic gene cluster
- I/P, identities/positives in amino acid sequences.
- ABB88519
- ABB88520
- ABB88522
- ABB88523
- , N/A (no close enzyme with high sequence similarity)
- SRIM\_RS28565
- SRIM\_RS28570
- flaviolin and 1,3,6,8-tetrahydroxynaphthalene
- CCA62437

**Table S4.** Closest biosynthetic enzymes to PKSs and/or NRPSs in the gene clusters of *S. olivaceus* DC10-5.

| Gene cluster   | ORF encoding PKS or NRPS<br>(Domain organization) <sup>a</sup>                                                                                                         | Closest biosynthetic enzyme<br>(Domain organization) <sup>b</sup>                                                                                                                 | Product <sup>c</sup>   | Similarity<br>(I/P, %) <sup>d</sup> |
|----------------|------------------------------------------------------------------------------------------------------------------------------------------------------------------------|-----------------------------------------------------------------------------------------------------------------------------------------------------------------------------------|------------------------|-------------------------------------|
| <i>t1pks-1</i> | TPA0905_20000<br>(AT <sub>m</sub> ACP<br>KS AT <sub>m</sub> DH KR ACP<br>KS AT <sub>mm</sub> KR ACP)                                                                   | ORF 3 <sup>e</sup><br>(KS AT <sub>m</sub> ACP<br>KS AT <sub>mm</sub> DH KR ACP<br>KS AT <sub>mm</sub> KR ACP)                                                                     | E-837                  | 46/56                               |
|                | TPA0905_19990<br>(KS AT <sub>m</sub> ACP<br>KS AT <sub>mm</sub> DH KR ACP<br>KS AT <sub>m</sub> DH KR ACP<br>KS AT <sub>mm</sub> KR ACP)                               | ORF 4 <sup>f</sup><br>(KS AT <sub>m</sub> DH KR ACP<br>KS AT <sub>mm</sub> DH KR ACP)                                                                                             |                        | 47/58                               |
|                | TPA0905_20030<br>(KS AT <sub>m</sub> DH ER KR ACP<br>KS AT <sub>mm</sub> DH KR ACP)                                                                                    | ORF 6 <sup>g</sup><br>(KS AT <sub>m</sub> DH KR ACP<br>KS AT <sub>mm</sub> KR ACP)                                                                                                |                        | 53/64                               |
|                | TPA0905_20040<br>(KS AT <sub>m</sub> ACP TE)                                                                                                                           | ORF 7 <sup>h</sup><br>(KS AT <sub>mm</sub> KR ACP TE)                                                                                                                             |                        | 53/62                               |
| <i>nrps-1</i>  | TPA0905_21720<br>(A <sub>orn</sub> PCP E<br>C A <sub>thr</sub> PCP E<br>C A <sub>orn</sub> PCP)                                                                        | SCO0492<br>(A <sub>orn</sub> PCP E<br>C A <sub>thr</sub> PCP E<br>C A <sub>orn</sub> PCP)                                                                                         | coelichelin            | 83/87                               |
| <i>nrps-2</i>  | TPA0905_26970<br><br>(C A <sub>thr</sub> PCP<br>C A PCP<br>C A <sub>pro</sub> PCP<br>C A <sub>phe</sub> PCP<br>C A <sub>tyr</sub> MT PCP<br>C A <sub>val</sub> PCP TE) | SpnA <sup>n</sup><br>(C A PCP<br>C A <sub>thr</sub> PCP<br>C A PCP<br>C A <sub>pro</sub> PCP<br>C A <sub>phe</sub> PCP<br>C A <sub>tyr</sub> MT PCP<br>C A <sub>val</sub> PCP TE) | streptopectolin        | 87/91                               |
| <i>t1pks-2</i> | TPA0905_27620<br>(CoL KR ACP<br>KS AT <sub>mm</sub> DH KR ACP<br>KS AT <sub>m</sub> ACP<br>KS AT <sub>m</sub> KR ACP)                                                  | DivK<br>(CoL KR ACP<br>KS AT <sub>mm</sub> DH KR ACP<br>KS AT <sub>m</sub> ACP<br>KS AT <sub>m</sub> KR ACP)                                                                      | divergolides<br>A to D | 98/98                               |
|                | TPA0905_27610<br>(KS AT <sub>em</sub> DH ER KR ACP)                                                                                                                    | DivL1<br>(KS AT <sub>em</sub> DH ER KR ACP)                                                                                                                                       |                        | 97/98                               |
|                | TPA0905_27600<br>(KS AT <sub>m</sub> DH KR ACP)                                                                                                                        | DivL2<br>(KS AT <sub>m</sub> DH KR ACP)                                                                                                                                           |                        | 97/97                               |
|                | TPA0905_27590<br>(KS AT DH ER KR ACP)                                                                                                                                  | DivL3<br>(KS AT DH ER KR ACP)                                                                                                                                                     |                        | 96/97                               |
|                | TPA0905_27580<br>(KS AT <sub>mm</sub> ACP<br>KS AT <sub>m</sub> DH KR ACP)                                                                                             | DivM<br>(KS AT <sub>mm</sub> ACP<br>KS AT <sub>m</sub> DH KR ACP)                                                                                                                 |                        | 98/99                               |
|                |                                                                                                                                                                        |                                                                                                                                                                                   |                        |                                     |
| <i>nrps-3</i>  | TPA0905_27950<br>(C A PCP E<br>C A PCP E C)                                                                                                                            | Amir_2719<br>(C A PCP E<br>C A PCP E C)                                                                                                                                           | mirubactin             | 61/68                               |
| <i>nrps-4</i>  | TPA0905_28750<br>(PCP C A PCP<br>C A <sub>cys</sub> PCP)                                                                                                               | SCO7682<br>(PCP C A <sub>arg</sub> PCP<br>C A <sub>cys</sub> PCP)                                                                                                                 | coelibactin            | 81/85                               |
|                | TPA0905_28740<br>(C A <sub>cys</sub> MT PCP TE)                                                                                                                        | SCO7683<br>(C A <sub>cys</sub> MT PCP TE)                                                                                                                                         |                        | 87/91                               |
| <i>nrps-5</i>  | TPA0905_31870<br>(C A <sub>val</sub> PCP TE)                                                                                                                           | -                                                                                                                                                                                 | -                      | -                                   |
| <i>nrps-6</i>  | TPA0905_32610<br>(A)                                                                                                                                                   | SfaB<br>(A)                                                                                                                                                                       | SF2768                 | 75/84                               |

|                   |                                                                                                                                              |                                                                                                                                      |                                    |        |
|-------------------|----------------------------------------------------------------------------------------------------------------------------------------------|--------------------------------------------------------------------------------------------------------------------------------------|------------------------------------|--------|
|                   | TPA0905_32600<br>(PCP)                                                                                                                       | SfaC<br>(PCP)                                                                                                                        |                                    | 64/77  |
|                   | TPA0905_32590<br>(C A PCP TD)                                                                                                                | SfaD<br>(C A PCP TD)                                                                                                                 |                                    | 65/73  |
| <i>t1pks-3</i>    | TPA0905_36560<br>(KS AT <sub>mm</sub> DH ER KR ACP ACP)                                                                                      | SLI_1088<br>(KS AT <sub>mm</sub> DH ER KR ACP ACP)                                                                                   | arsono-polyketide                  | 83/88  |
| <i>pks/nrps-1</i> | TPA0905_37460<br>(KS AT DH KR ACP<br>C A <sub>orn</sub> PCP TE)                                                                              | PtmA<br>(KS AT DH KR ACP<br>C A <sub>orn</sub> PCP TE)                                                                               | pactamides                         | 99/99  |
| <i>t2pks-1</i>    | TPA0905_38360<br>(KS $\alpha$ )                                                                                                              | RslK3<br>(KS $\alpha$ )                                                                                                              | rishirilide B                      | 93/94  |
|                   | TPA0905_38350<br>(KS $\beta$ )                                                                                                               | RslK2<br>(KS $\beta$ )                                                                                                               |                                    | 89/92  |
|                   | TPA0905_38340<br>(ACP)                                                                                                                       | RslK1<br>(ACP)                                                                                                                       |                                    | 85/94  |
| <i>nrps-7</i>     | TPA0905_38170<br>(C A PCP<br>C A PCP<br>C A PCP)                                                                                             | -                                                                                                                                    | -                                  | -      |
| <i>t2pks-2</i>    | TPA0905_44220<br>(KS $\alpha$ )                                                                                                              | AAG26879.1<br>(KS $\alpha$ )                                                                                                         | spore pigment                      | 81/87  |
|                   | TPA0905_44220<br>(KS $\beta$ )                                                                                                               | AAG26880.1<br>(KS $\beta$ )                                                                                                          |                                    | 75/83  |
|                   | TPA0905_44220<br>(ACP)                                                                                                                       | AAG26884.1<br>(ACP)                                                                                                                  |                                    | 55/70  |
| <i>nrps-8</i>     | TPA0905_46660<br>(C A PCP E<br>C PCP)                                                                                                        | -                                                                                                                                    | -                                  | -      |
|                   | TPA0905_46650<br>(C A <sub>phe</sub> PCP<br>C A <sub>gly</sub> PCP TE)                                                                       | -                                                                                                                                    |                                    | -      |
| <i>pks/nrps-3</i> | TPA0905_63960<br>(C A PCP TE)                                                                                                                | RmoH <sup>j</sup><br>(C A <sub>val</sub> PCP TE)                                                                                     | rimosamide                         | 58/69  |
|                   | TPA0905_63950<br>(A PCP<br>C A <sub>pro</sub> PCP<br>KS KR ACP TE)                                                                           | RmoI <sup>k</sup><br>(A <sub>ile</sub> PCP<br>C A <sub>pro</sub> PCP<br>KS KR ACP TE)                                                |                                    | 61/69  |
| <i>t3pks-1</i>    | TPA0905_65120<br>(KS)                                                                                                                        | SCO1206<br>(KS)                                                                                                                      | flaviolin <i>etc.</i> <sup>1</sup> | 90/94  |
| <i>t3pks-2</i>    | TPA0905_72620<br>(KS)                                                                                                                        | germicidins A and B synthase <sup>m</sup><br>(KS)                                                                                    | germicidins<br>A & B               | 99/100 |
| <i>pks/nrps-4</i> | TPA0905_73570<br>(KS AT <sub>m</sub> ACP<br>KS AT <sub>mm</sub> DH KR ACP<br>KS AT <sub>mm</sub> KR ACP<br>KS AT <sub>mm</sub> DH ER KR ACP) | TotA1<br>(KS AT <sub>m</sub> ACP<br>KS AT <sub>mm</sub> DH KR ACP<br>KS AT <sub>mm</sub> KR ACP<br>KS AT <sub>mm</sub> DH ER KR ACP) | totopotensamides<br>A & B          | 99/99  |
|                   | TPA0905_73580<br>(KS AT <sub>mm</sub> DH ER KR ACP<br>KS AT <sub>m</sub> KR ACP)                                                             | TotA2<br>(KS AT <sub>mm</sub> DH ER KR ACP<br>KS AT <sub>m</sub> KR ACP)                                                             |                                    | 99/98  |
|                   | TPA0905_73610<br>(C A <sub>thr</sub> PCP<br>C A PCP<br>C PCP<br>C A PCP<br>C A PCP<br>C A <sub>ser</sub> PCP TE)                             | TotA3<br>(C A <sub>thr</sub> PCP<br>C A <sub>ala</sub> PCP<br>C PCP<br>C A <sub>dhb</sub> PCP<br>C A PCP<br>C A PCP TE)              |                                    | 99/99  |



|                |                                                                                                                                                  |                                                                                                                                          |              |       |
|----------------|--------------------------------------------------------------------------------------------------------------------------------------------------|------------------------------------------------------------------------------------------------------------------------------------------|--------------|-------|
| <i>t1pks-5</i> | TPA0905_74080<br>(KS AT ACP<br>KS AT <sub>mm</sub> DH KR ACP<br>KS AT DH KR ACP<br>KS AT <sub>mm</sub> DH KR ACP)                                | LobS1<br>(KS AT ACP<br>KS AT <sub>mm</sub> DH KR ACP<br>KS AT DH KR ACP<br>KS AT <sub>mm</sub> DH KR ACP)                                | lobophorin A | 97/97 |
|                | TPA0905_74070<br>(KS AT <sub>m</sub> DH KR ACP<br>KS AT <sub>mm</sub> DH KR ACP<br>KS AT <sub>m</sub> DH KR ACP<br>KS AT <sub>m</sub> DH KR ACP) | LobS2<br>(KS AT <sub>mm</sub> DH KR ACP<br>KS AT <sub>m</sub> DH KR ACP<br>KS AT <sub>m</sub> DH KR ACP<br>KS AT <sub>m</sub> DH KR ACP) |              | 94/95 |
|                | TPA0905_74060<br>(KS AT <sub>mm</sub> DH KR ACP)                                                                                                 | LobS3<br>(KS AT <sub>mm</sub> DH KR ACP)                                                                                                 |              | 84/87 |
|                | TPA0905_74050<br>(KS AT <sub>m</sub> KR ACP)                                                                                                     | LobS5<br>(KS AT <sub>m</sub> ACP)                                                                                                        |              | 95/95 |
|                | TPA0905_74930<br>(KS AT DH ER KR ACP<br>KS AT <sub>mm</sub> DH KR ACP)                                                                           | LobS4<br>(KS AT DH ER KR ACP<br>KS AT <sub>mm</sub> DH KR ACP)                                                                           |              | 93/94 |

Footnotes are the same in Table S3.

n. SO3561\_09657
